# Supplementary material for: A Mathematical Modeling Approach for Targeted Radionuclide and Chimeric Antigen Receptor-T Cell Combination Therapy
Source: Preprints.org preprint supplement (doi:10.20944/preprints202109.0300.v1), 2021-09-17
Supplement: Supplementary file 1 [file Supplemental_data_BLI.xlsx]

## Sheet: Sheet1
											CAR-T
6	2680000	3410000	25700000	8740000				3680000	3480000	6000000	5080000	3340000	3250000	7760000
14	14800000	17400000	23600000	47700000				1780000	2250000	5520000	2000000	4940000	1620000	1780000
19	144000000	88600000	45500000	335000000				2420000	2370000	5630000	2210000	2050000	1570000	1900000
26	1480000000	1730000000	4260000000	348000000				3740000	3170000	4130000	2180000	6890000	1900000	2790000
33	5210000000	14500000000	8550000000	6720000000				3940000	5270000	5350000	4630000	10000000	2730000	11100000
40	39800000000	29200000000	10300000000	35100000000				18700000	996000	1560000	8040000	38800000	1740000	1390000
48	203000000000	247000000000	67100000000	311000000000				32500000	897000	3960000	467000000	283000000	1390000	24100000
54								805000000	1350000		981000000	224000000	1740000	777000000
61								2740000000	25700000	96500000	18800000000	666000000	21200000	4070000000
68								554000000	80300000	64000000		9000000000	235000000	60700000000
75								62500000000	425000000	171000000		18300000000	542000000	119000000000
82								112000000000	1030000000	415000000		34100000000	1110000000	307000000000
89								233000000000	1380000000	562000000		62800000000	1630000000	390000000000
96												83400000000

## Sheet: Sheet2
								Belly BLI measurements
		Control mice												CAR-T cell treated mice
Time (days)	6	14	19	26	33	40	48			Time (days)	6	14	19	26	33	40	48	54	61	68	75	82	89
Mouse #										Mouse #
1	21400000	29400000	130000000	1400000000	X	X	X			1	3680000	1780000	2420000	3740000	3940000	18700000	32500000	805000000	2740000000	554000000	62500000000	112000000000	233000000000
2	2730000	12300000	88600000	1600000000	X	X	X			2	3480000	2250000	2370000	3170000	5270000	996000	897000	1350000	25700000	80300000	425000000	1030000000	1380000000
3	5660000	31600000	363000000	2360000000	X	X	X			3	6000000	5520000	5630000	4130000	5350000	1560000	3960000		96500000	64000000	171000000	415000000	562000000
4	2680000	14800000	144000000	1480000000	5210000000	39800000000	203000000000			4	5080000	2000000	2210000	2180000	4630000	8040000	467000000	981000000	18800000000
5	3410000	17400000	88600000	1730000000	14500000000	29200000000	247000000000			5	3340000	4940000	2050000	6890000	10000000	38800000	283000000	224000000	666000000	9000000000	18300000000	34100000000	62800000000
6	25700000	23600000	45500000	4260000000	8550000000	10300000000	67100000000			6	3250000	1620000	1570000	1900000	2730000	1740000	1390000	1740000	21200000	235000000	542000000	1110000000	1630000000
7	8740000	47700000	335000000	348000000	6720000000	35100000000	311000000000			7	7760000	1780000	1900000	2790000	11100000	1390000	24100000	777000000	4070000000	60700000000	119000000000	307000000000	390000000000
